# Supplementary material for: Hsa_circ_0004296 inhibits metastasis of prostate cancer by interacting with EIF4A3 to prevent nuclear export of ETS1 mRNA
Source: PubMed Central journal article supplement (PMC8543852; doi:10.1186/s13046-021-02138-8), 2021-10-25

T A A G C A G A G C T C G T T T A G T G A A C C G T C A G A T C G C C T G G A G A C G C C A T C C A C G C T G T T T T

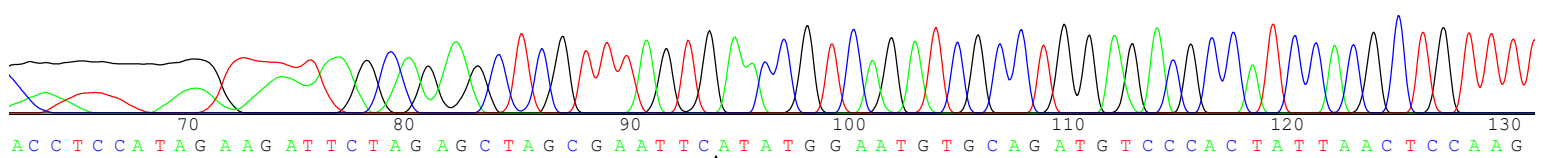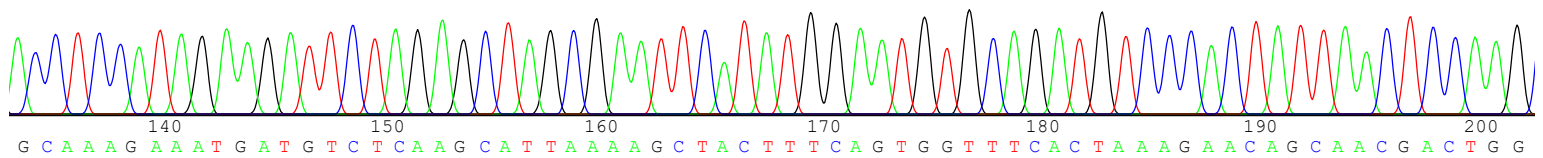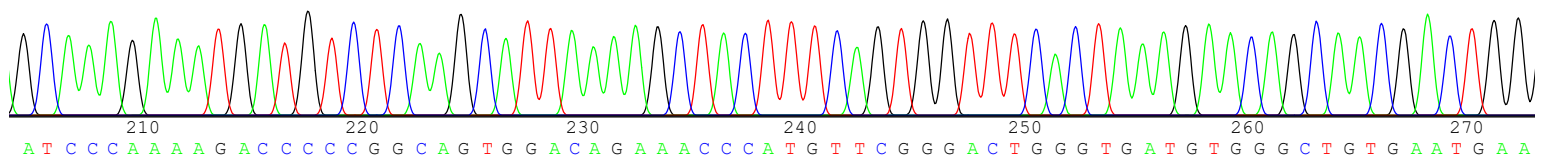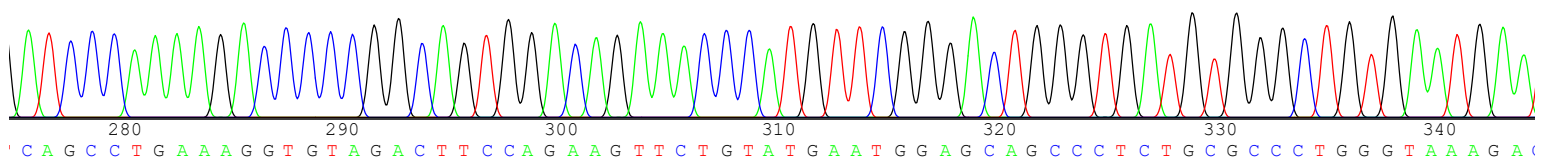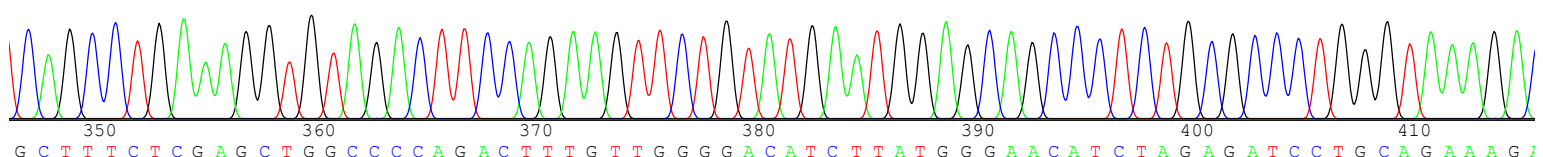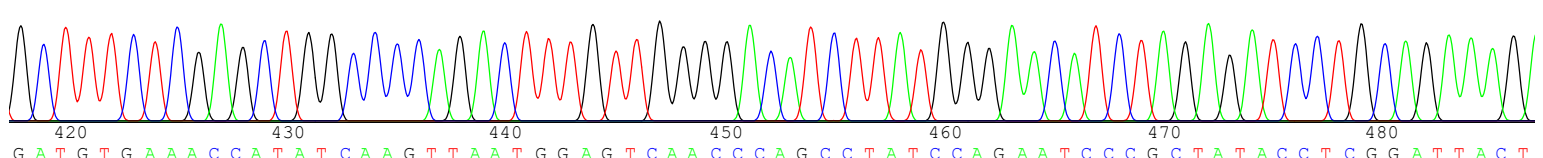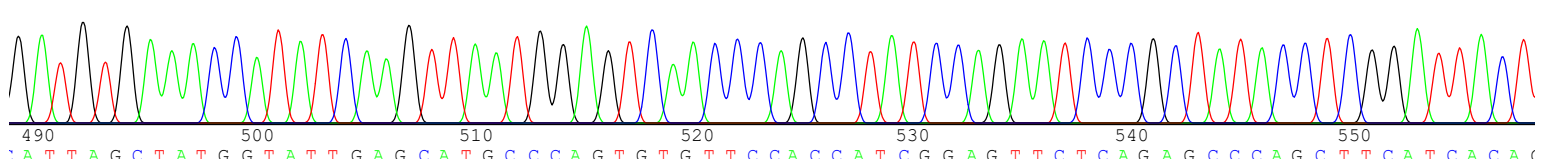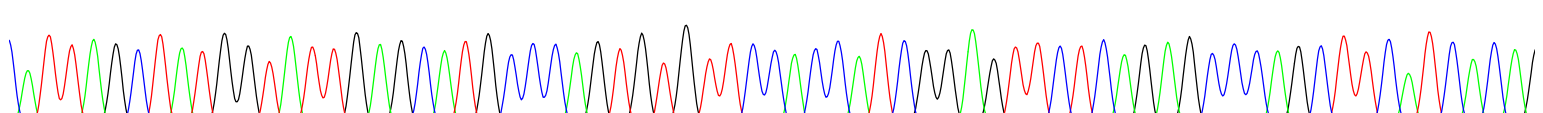

50 570 580 590 600 610 620 6

G T C C T A T C A G A C G C T C C A T C C C A T C A G C T C G G A A G A G C T C C T C T C C C T C A A G T A T G A G A A T G A C T A C C C C

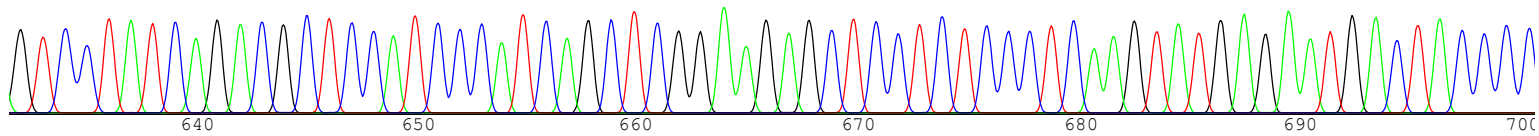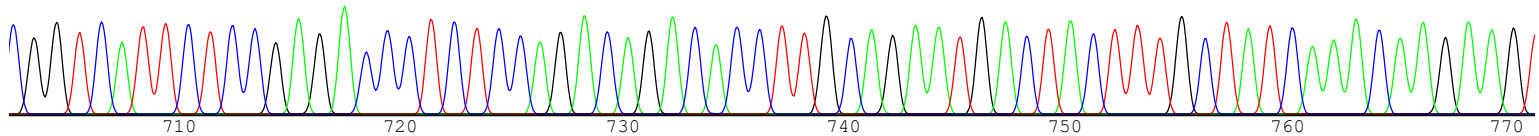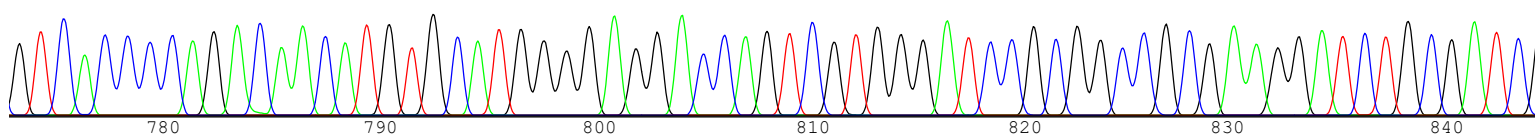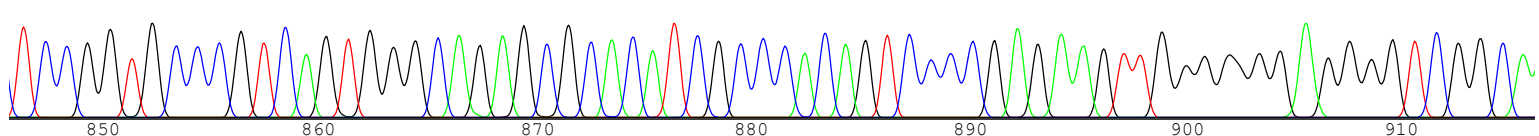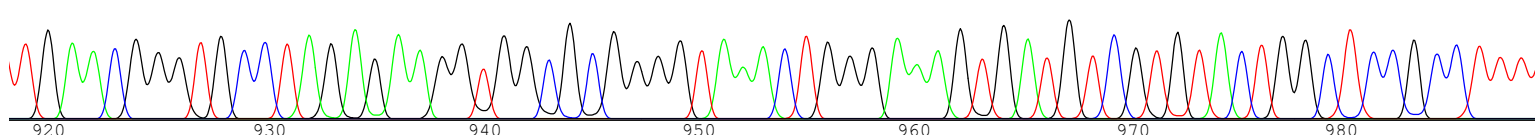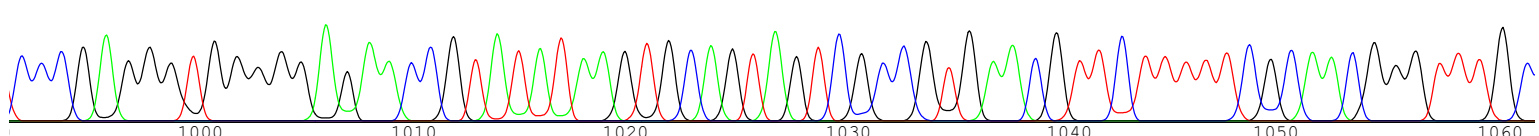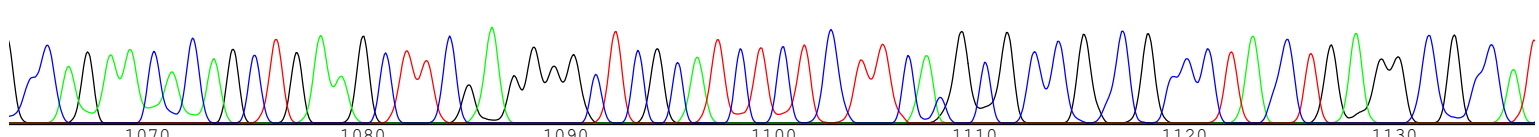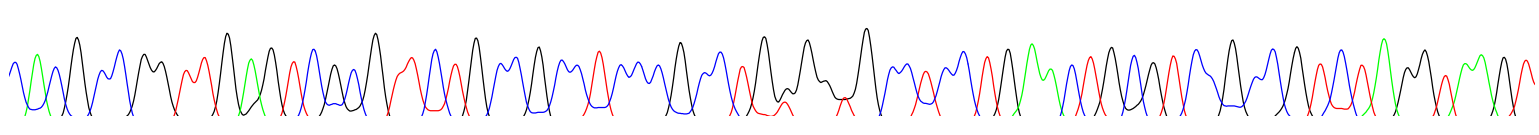

1140 1150 1160  
' A A A G C T C A G G T C G A G A C G G G C C T T T G

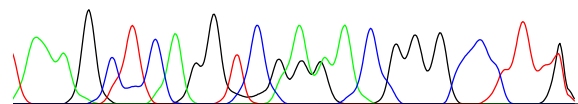

Supplement: 13046_2021_2138_MOESM1_ESM.pdf [file 13046_2021_2138_MOESM1_ESM.pdf]
