# Supplementary material for: Hsa_circ_0004296 inhibits metastasis of prostate cancer by interacting with EIF4A3 to prevent nuclear export of ETS1 mRNA
Source: PubMed Central journal article supplement (PMC8543852; doi:10.1186/s13046-021-02138-8), 2021-10-25

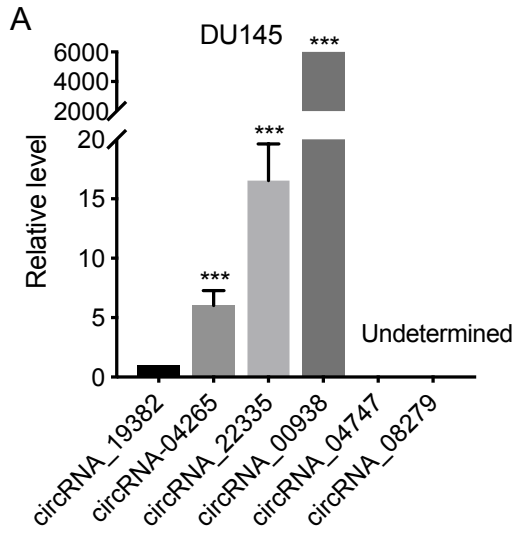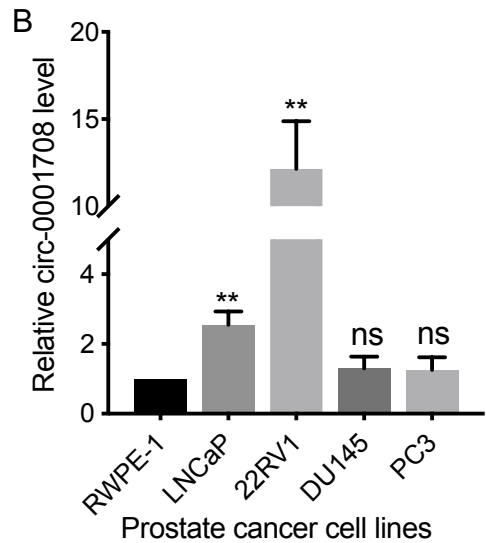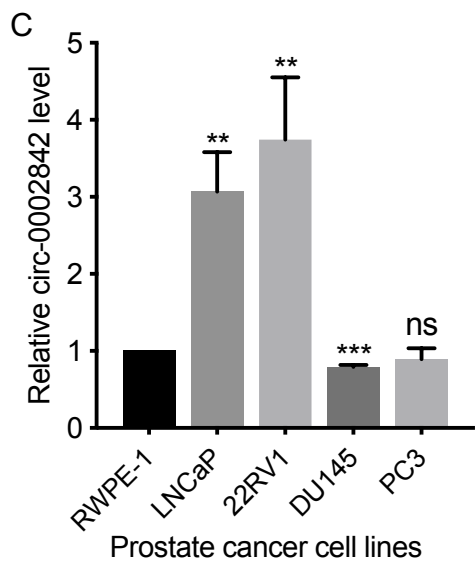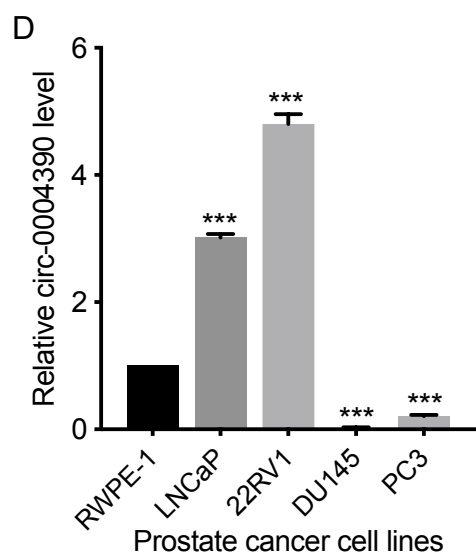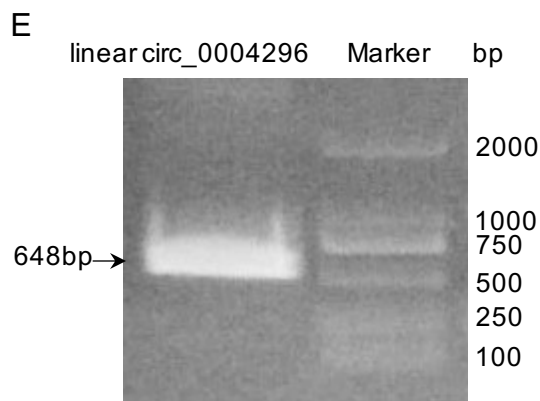

Supplement: 13046_2021_2138_MOESM4_ESM.pdf [file 13046_2021_2138_MOESM4_ESM.pdf]
